# Supplementary material for: Correlation Between Periodontitis and Non-Alcoholic Fatty Liver Disease: Systematic Review and Meta-Analysis
Source: Research Square preprint supplement (doi:10.21203/rs.3.rs-7434817/v1), 2025-09-25
Supplement: Supplementary file 1 [file a1b3450dfde58065d8b9f5c5.docx]

#### Appendix: Summary of Search Strategies for Various Databases

| **Databases** | **Search Strategy** |
| --- | --- |
| **PubMed** | ((((((((((Periodontitis[MeSH Terms]) OR (Periodontal Diseases[MeSH Terms])) OR (Pericementitis[Title/Abstract])) OR (Periodontitides[Title/Abstract])) OR (Pericementitides[Title/Abstract])) OR (Parodontosis[Title/Abstract])) OR (Pyorrhea Alveolaris[Title/Abstract])) OR (Parodontoses[Title/Abstract])) OR (Periodontitis[Title/Abstract])) OR (Periodontal Diseases[Title/Abstract])) AND ((((((((Non-alcoholic Fatty Liver Disease[MeSH Terms]) OR (Non-alcoholic Fatty Liver Disease[Title/Abstract])) OR (NAFLD[Title/Abstract])) OR (Nonalcoholic Steatohepatitis[Title/Abstract])) OR (Nonalcoholic Steatohepatitides[Title/Abstract])) OR (Steatohepatitides, Nonalcoholic[Title/Abstract])) OR (Steatohepatitis, Nonalcoholic[Title/Abstract])) OR (Nonalcoholic Fatty Liver[Title/Abstract])) |
| **Scopus** | **( ( TITLE-ABS-KEY ( Non-alcoholic Fatty Liver Disease ) OR TITLE-ABS-KEY ( NAFLD ) OR TITLE-ABS-KEY ( Nonalcoholic Steatohepatitis ) OR TITLE-ABS-KEY ( Nonalcoholic Steatohepatitides ) OR TITLE-ABS-KEY ( Steatohepatitides , Nonalcoholic ) OR TITLE-ABS-KEY ( Steatohepatitis , Nonalcoholic ) OR TITLE-ABS-KEY ( Nonalcoholic Fatty Liver ) ) ) AND ( ( TITLE-ABS-KEY ( Periodontitis ) OR TITLE-ABS-KEY ( Pericementitis ) OR TITLE-ABS-KEY ( Periodontitides ) OR TITLE-ABS-KEY ( Pericementitides ) OR TITLE-ABS-KEY ( Periodontal Diseases ) OR TITLE-ABS-KEY ( Parodontosis ) OR TITLE-ABS-KEY ( Pyorrhea Alveolaris ) OR TITLE-ABS-KEY ( Parodontoses ) ) )** |
| **Embase** | ('Non-alcoholic Fatty Liver Disease'):ab,ti OR ((NAFLD):ab,ti) OR (('Nonalcoholic Steatohepatitis'):ab,ti) OR (('Nonalcoholic Steatohepatitides'):ab,ti) OR (('Steatohepatitides, Nonalcoholic'):ab,ti) OR (('Steatohepatitis, Nonalcoholic'):ab,ti) OR (('Nonalcoholic Fatty Liver'):ab,ti) AND (Periodontitis):ab,ti OR ((Pericementitis):ab,ti) OR ((Periodontitides):ab,ti) OR ((Pericementitides):ab,ti) OR (('Periodontal Diseases'):ab,ti) OR ((Parodontosis):ab,ti) OR (('Pyorrhea Alveolaris'):ab,ti) OR ((Parodontoses):ab,ti) |
| **Web of Science** | **(TS=(Non-alcoholic Fatty Liver Disease) OR TS=(NAFLD) OR TS=(Nonalcoholic Steatohepatitis) OR TS=(Nonalcoholic Steatohepatitides) OR TS=(Steatohepatitides, Nonalcoholic) OR TS=(Steatohepatitis, Nonalcoholic) OR TS=(Nonalcoholic Fatty Liver)) AND (TS=(Periodontitis) OR TS=(Pericementitis) OR TS=(Periodontitides) OR TS=(Pericementitides) OR TS=(Periodontal Diseases) OR TS=(Parodontosis) OR TS=(Pyorrhea Alveolaris) OR TS=(Parodontoses))** |
